# Supplementary material
Source: publisher figshare collection journal article supplement (https://acs.figshare.com/ndownloader/files/5051263)
Supplement: Supplementary file 1 [file 5051263]

# Supporting Information

## Stitching 2D polymeric layers into flexible 3D metal-organic frameworks via the sequential self-assembly approach

*Hao Zhang<sup>†,‡</sup>, Tianlu Sheng<sup>†</sup>, Shengmin Hu<sup>†</sup>, Chao Zhuo<sup>†,‡</sup>, Haoran Li<sup>†,‡</sup>,  
Ruibiao Fu<sup>†</sup>, Yuehong Wen<sup>†</sup>, and Xintao Wu<sup>†,\*</sup>*

<sup>†</sup>State Key Laboratory of Structure Chemistry, Fujian Institute of Research on the Structure of Matter, Chinese Academy of Sciences, Fuzhou, Fujian, 350002, China

<sup>‡</sup>Graduate School of the Chinese Academy of Sciences, Beijing, 100049, China

*E-mail: [wxt@fjirsm.ac.cn](mailto:wxt@fjirsm.ac.cn) Tel: +86-591- 83719238. Fax: +86-591- 83719238.*

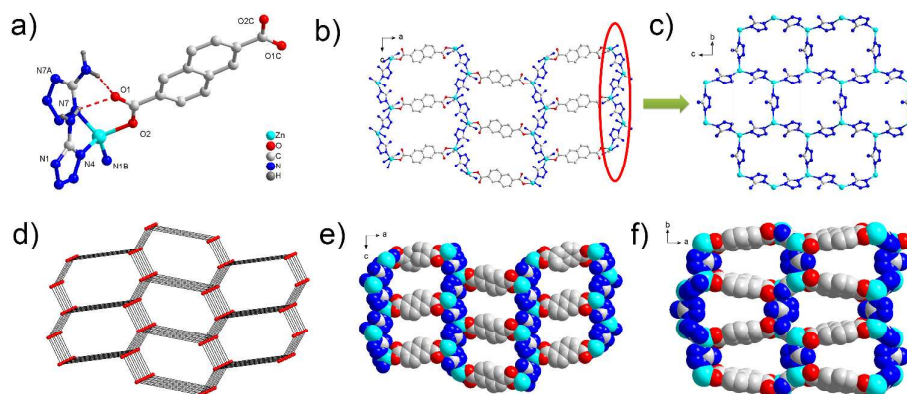

**Figure S1.** (a) Zn (II) coordination environments of **A3**. Symmetry codes: (A)  $-x, -y, 1-z$ ; (B)  $x, 0.5-y, z$ ; (C)  $0.5-x, -y, 0.5+z$ . Part of hydrogen atoms are omitted for clarity. (b) View of the 3D framework from the  $bc$  plane layer. (c) 2D layer of **A3**. (d) 3D uninodal 4-connected network with a 'lon' topology with point symbol  $\{66\}$  of **A3**. (e) Space-filling model of **A3** along  $b$  crystallographic axis. (f) Space-filling model of **A3** along crystallographic  $c$  axis.

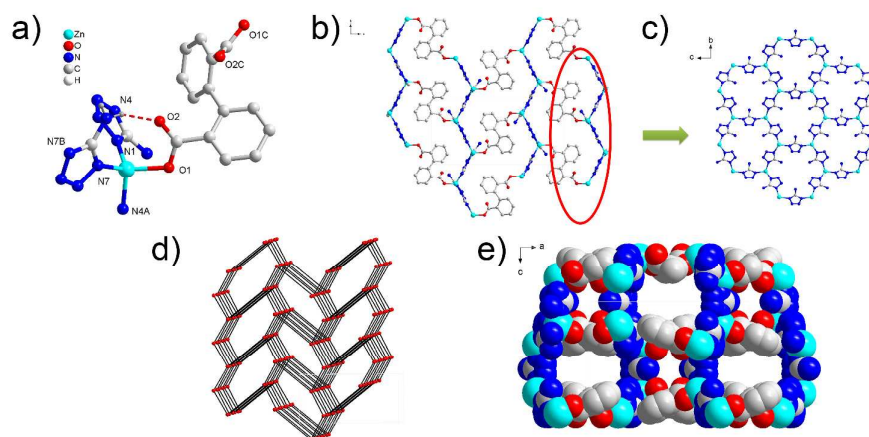

**Figure S2.** (a) Zn (II) coordination environments of **A4**. Symmetry codes: (A)  $-x, -0.5-y, z$ ; (B)  $0.5-x, -y, -0.5+z$ ; (C)  $-x, -y, -z$ . Part of hydrogen atoms are omitted for clarity. (b) View of the 3D framework from the  $bc$  plane layer. (c) 2D layer of **A4**. (d) 3D uninodal 4-connected network with a 'lon' topology with point symbol  $\{66\}$  of **A4**. (e) Space-filling model of **A4** along crystallographic  $b$  axis.

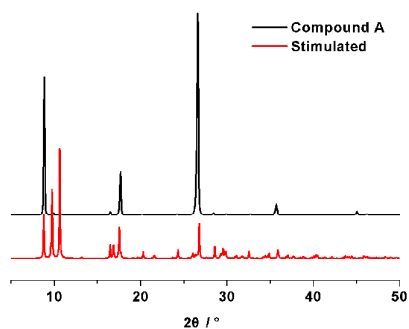

**Figure S3.** PXRD patterns of simulated from the single-crystal data of compound **A** (red); as-synthesized (black).

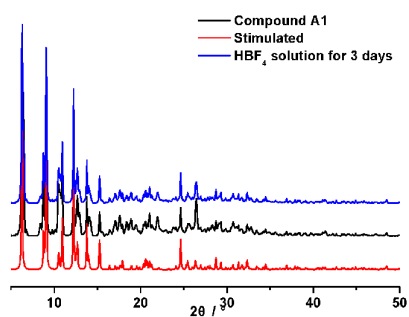

**Figure S4.** PXRD patterns of simulated from the single-crystal data of compound **A1** (red); as-synthesized (black); the sample soaked in  $\text{HBF}_4$  solution for 3 days (blue). Note: 10 drops 50%  $\text{HBF}_4$  is added into 15 ml DMF to obtain the  $\text{HBF}_4$  solution.

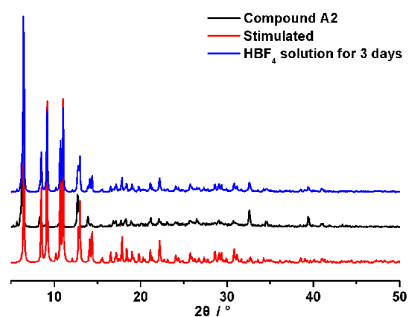

**Figure S5.** PXRD patterns of simulated from the single-crystal data of compound **A2** (red); as-synthesized (black) ; the sample soaked in  $\text{HBF}_4$  solution for 3 days (blue). Note: 10 drops 50%  $\text{HBF}_4$  is added into 15 ml DMF to obtain the  $\text{HBF}_4$  solution.

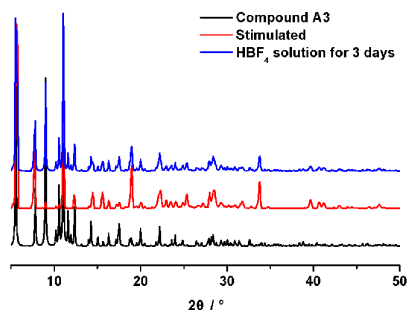

**Figure S6.** PXRD patterns of simulated from the single-crystal data of compound **A3**(red); as-synthesized (black) ; the sample soaked in HBF<sub>4</sub> solution for 3 days (blue). Note: 10 drops 50% HBF<sub>4</sub> is added into 15 ml DMF to obtain the HBF<sub>4</sub> solution.

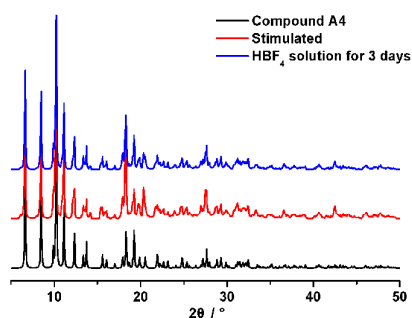

**Figure S7.** PXRD patterns of simulated from the single-crystal data of compound **A4** (red); as-synthesized (black) ; the sample soaked in HBF<sub>4</sub> solution for 3 days (blue). Note: 10 drops 50% HBF<sub>4</sub> is added into 15 ml DMF to obtain the HBF<sub>4</sub> solution.

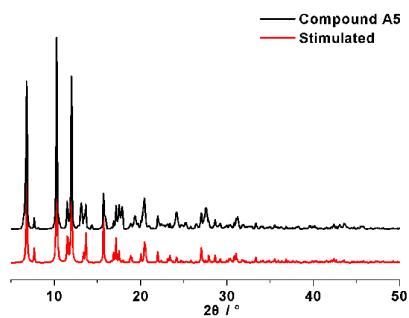

**Figure S8.** PXRD patterns of simulated from the single-crystal data of compound **A5** (red); as-synthesized (black).

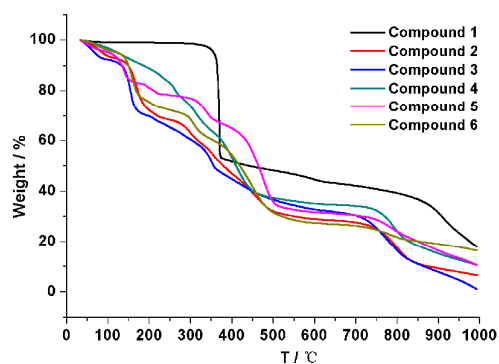

**Figure S9.** TGA curves for compounds 1-6.

**Table S1.** Crystallographic Data for compounds **A** and **A1-A5**.

| Compound                                  | <b>A</b>                                         | <b>A1</b>                                                        | <b>A2</b>                                                            | <b>A3</b>                                                              | <b>A4</b>                                                         | <b>A5</b>                                                        |
|-------------------------------------------|--------------------------------------------------|------------------------------------------------------------------|----------------------------------------------------------------------|------------------------------------------------------------------------|-------------------------------------------------------------------|------------------------------------------------------------------|
| Empirical formula                         | C <sub>2</sub> H <sub>4</sub> N <sub>10</sub> Zn | C <sub>6.5</sub> H <sub>9</sub> N <sub>8</sub> O <sub>2</sub> Zn | C <sub>6.5</sub> H <sub>9.5</sub> N <sub>8.5</sub> O <sub>2</sub> Zn | C <sub>10</sub> H <sub>15.5</sub> N <sub>8.5</sub> O <sub>3.5</sub> Zn | C <sub>9.5</sub> H <sub>11</sub> N <sub>8</sub> O <sub>2</sub> Zn | C <sub>15</sub> H <sub>10</sub> N <sub>5</sub> O <sub>4</sub> Zn |
| Formula weight                            | 233.54                                           | 296.59                                                           | 304.10                                                               | 319.60                                                                 | 334.63                                                            | 389.67                                                           |
| Crystal system                            | Orthorhombic                                     | Orthorhombic                                                     | Orthorhombic                                                         | Orthorhombic                                                           | Orthorhombic                                                      | Orthorhombic                                                     |
| Space group                               | <i>Cmcm</i>                                      | <i>Pnma</i>                                                      | <i>Pnma</i>                                                          | <i>Pnma</i>                                                            | <i>Pnnm</i>                                                       | <i>Pbca</i>                                                      |
| <i>a</i> (Å)                              | 17.949(7)                                        | 28.13(3)                                                         | 27.250(15)                                                           | 31.928(17)                                                             | 20.818(9)                                                         | 22.954(11)                                                       |
| <i>b</i> (Å)                              | 10.453(4)                                        | 14.427(16)                                                       | 16.002(9)                                                            | 16.003(8)                                                              | 9.887(4)                                                          | 10.328(5)                                                        |
| <i>c</i> (Å)                              | 19.881(9)                                        | 10.380(12)                                                       | 10.292(5)                                                            | 10.329(5)                                                              | 17.281(7)                                                         | 25.873(11)                                                       |
| $\alpha$ (°)                              | 90.00                                            | 90.00                                                            | 90.00                                                                | 90.00                                                                  | 90.00                                                             | 90.00                                                            |
| <i>V</i> (Å <sup>3</sup> )                | 3730(3)                                          | 4212(8)                                                          | 4488(4)                                                              | 5278(5)                                                                | 3557(3)                                                           | 6134(5)                                                          |
| <i>Z</i>                                  | 16                                               | 8                                                                | 8                                                                    | 8                                                                      | 8                                                                 | 8                                                                |
| <i>D<sub>c</sub></i> (g/cm <sup>3</sup> ) | 1.663                                            | 0.935                                                            | 0.900                                                                | 0.804                                                                  | 1.250                                                             | 0.844                                                            |
| $\mu$ (mm <sup>-1</sup> )                 | 2.609                                            | 1.170                                                            | 1.100                                                                | 0.937                                                                  | 1.394                                                             | 0.817                                                            |
| <i>F</i> (000)                            | 1855                                             | 1200                                                             | 1232                                                                 | 1288                                                                   | 1360                                                              | 1576                                                             |
| $\theta$ range (°)                        | 2.48 - 27.51                                     | 2.02 - 25.00                                                     | 2.35 - 27.44                                                         | 2.35 - 27.38                                                           | 2.28 - 27.48                                                      | 2.30 - 25.00                                                     |
| <i>R</i> (int)                            | 0.0662                                           | 0.0884                                                           | 0.0621                                                               | 0.0768                                                                 | 0.0772                                                            | 0.0742                                                           |
| <i>R<sub>i</sub></i> <sup>a</sup>         | 0.0721,                                          | 0.0863,                                                          | 0.0549,                                                              | 0.0744,                                                                | 0.0833,                                                           | 0.0884,                                                          |
| <i>wR</i> <sub>2</sub> <sup>b</sup>       | 0.1841                                           | 0.2113                                                           | 0.1681                                                               | 0.2254                                                                 | 0.1974                                                            | 0.2103                                                           |
| ( <i>I</i> > 2σ( <i>I</i> ))              |                                                  |                                                                  |                                                                      |                                                                        |                                                                   |                                                                  |
| GOF on <i>F</i> <sup>2</sup>              | 0.984                                            | 0.967                                                            | 1.022                                                                | 0.934                                                                  | 1.001                                                             | 0.922                                                            |

<sup>a</sup>  $R_I = \Sigma(|F_o| - |F_c|)/\Sigma|F_o|$ . <sup>b</sup>  $wR_2 = \{[\Sigma w[(F_o^2 - F_c^2)^2/\Sigma w(F_o^2)^2]]^{1/2}$ .

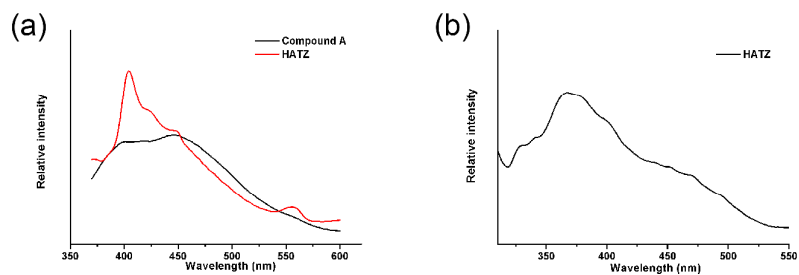

**Figure S10.** (a) Solid-state emission spectra for the HATZ ligand and Compound A, excited at 330 nm; (b) Solid-state emission spectra for the HATZ ligand, excited at 288 nm.

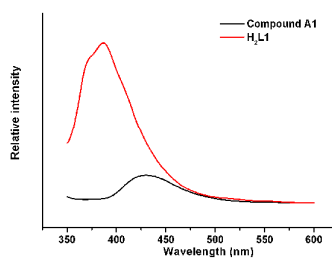

**Figure S11.** Solid-state emission spectra for the H<sub>2</sub>L1 ligand and Compound A1, excited at 330 nm.

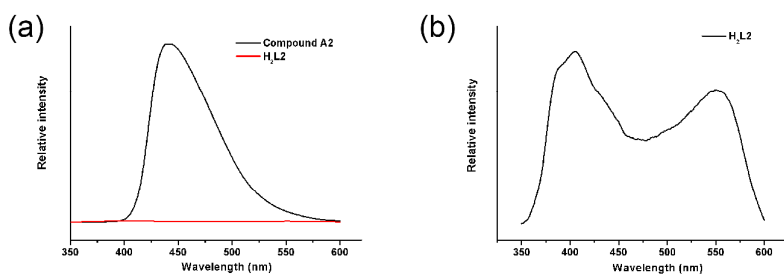

**Figure S12.** Solid-state emission spectra for the H<sub>2</sub>L2 ligand (b) and Compound A2, excited at 330 nm.

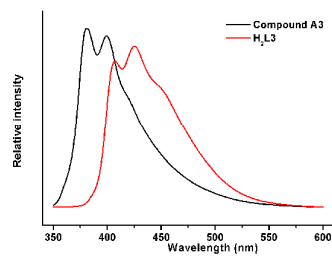

**Figure S13.** Solid-state emission spectra for the H<sub>2</sub>L3 ligand and Compound A3, excited at 330 nm.

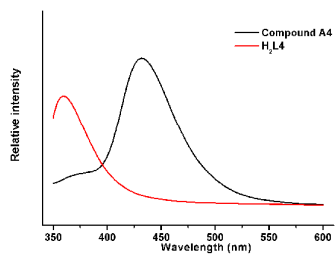

**Figure S14.** Solid-state emission spectra for the H<sub>2</sub>L4 ligand and Compound A4, excited at 330 nm.

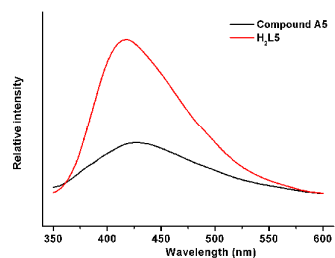

**Figure S15.** Solid-state emission spectra for the H<sub>2</sub>L5 ligand and Compound A5, excited at 330 nm.
